# Supplementary material
Source: PubMed Central journal article supplement (PMC8527734)
Supplement: mmc1.pdf [file mmc1.pdf]

**Supplemental Table 1.** Self-reported symptoms following first and second dose of Pfizer-BioNTech SARS-CoV-2 vaccine, by age.

|                                                       | Post-Dose 1          |                      |          | Post-Dose 2          |                      |          |
|-------------------------------------------------------|----------------------|----------------------|----------|----------------------|----------------------|----------|
|                                                       | Age <50<br>(n = 759) | Age ≥50<br>(n = 273) | P-value* | Age <50<br>(n = 759) | Age ≥50<br>(n = 273) | P-value* |
| <b>Any symptom, n (%)</b>                             | 473 (62.8)           | 141 (52.0)           | 0.002    | 578 (77.1)           | 174 (64.0)           | <0.001   |
| <b>Any symptom excluding injection site symptoms</b>  | 341 (45.3)           | 87 (32.1)            | <0.001   | 556 (74.1)           | 168 (61.8)           | <0.001   |
| <b>Pain at injection site</b>                         | 470 (61.9)           | 140 (51.3)           | 0.003    | 565 (74.4)           | 170 (62.3)           | <0.001   |
| ≤2 days                                               | 229 (48.7)           | 71 (50.7)            | 0.38     | 295 (52.2)           | 92 (54.1)            | 0.86     |
| 2-7 days                                              | 239 (50.9)           | 67 (47.9)            |          | 265 (46.9)           | 77 (45.3)            |          |
| >7 days                                               | 2 (0.4)              | 2 (1.4)              |          | 5 (0.9)              | 1 (0.6)              |          |
| <b>Fever or chills</b>                                | 85 (11.2)            | 23 (8.4)             | 0.242    | 323 (42.6)           | 87 (31.9)            | 0.002    |
| ≤2 days                                               | 4 (4.7)              | 1 (4.3)              | -        | 12 (3.7)             | 3 (3.4)              | 0.16     |
| 2-7 days                                              | 81 (95.3)            | 22 (95.7)            |          | 311 (96.3)           | 83 (95.4)            |          |
| >7 days                                               | 0 (0.0)              | 0 (0.0)              |          | 0 (0.0)              | 1 (1.1)              |          |
| <b>Fatigue or malaise</b>                             | 238 (31.4)           | 59 (21.6)            | 0.003    | 489 (64.6)           | 137 (50.2)           | <0.001   |
| ≤2 days                                               | 29 (12.2)            | 7 (11.9)             | 0.02     | 71 (14.5)            | 23 (16.8)            | 0.07     |
| 2-7 days                                              | 207 (87.0)           | 48 (81.4)            |          | 409 (83.6)           | 107 (78.1)           |          |
| >7 days                                               | 2 (0.8)              | 4 (6.8)              |          | 9 (1.8)              | 7 (5.1)              |          |
| <b>Headache, dizziness or lightheadedness</b>         | 170 (22.5)           | 52 (19.0)            | 0.276    | 350 (46.3)           | 101 (37.1)           | 0.011    |
| ≤2 days                                               | 23 (13.5)            | 8 (15.4)             | 0.79     | 34 (9.7)             | 12 (11.9)            | 0.13     |
| 2-7 days                                              | 143 (84.1)           | 42 (80.8)            |          | 308 (88.0)           | 83 (82.2)            |          |
| >7 days                                               | 4 (2.4)              | 2 (3.8)              |          | 8 (2.3)              | 6 (5.9)              |          |
| <b>Eye, ear, mouth, or throat changes</b>             | 22 (2.9)             | 1 (0.4)              | 0.029    | 29 (3.8)             | 5 (1.8)              | 0.166    |
| ≤2 days                                               | 5 (22.7)             | 0 (0.0)              | 0.83     | 5 (17.2)             | 1 (20.0)             | 0.03     |
| 2-7 days                                              | 16 (72.7)            | 1 (100.0)            |          | 23 (79.3)            | 2 (40.0)             |          |
| >7 days                                               | 1 (4.5)              | 0 (0.0)              |          | 1 (3.4)              | 2 (40.0)             |          |
| <b>Swollen lymph node, skin/nail, or face changes</b> | 8 (1.1)              | 2 (0.7)              | 0.915    | 45 (5.9)             | 12 (4.4)             | 0.426    |
| ≤2 days                                               | 2 (25.0)             | 1 (50.0)             | 0.56     | 19 (42.2)            | 7 (58.3)             | 0.53     |
| 2-7 days                                              | 3 (37.5)             | 0 (0.0)              |          | 19 (42.2)            | 3 (25.0)             |          |
| >7 days                                               | 3 (37.5)             | 1 (50.0)             |          | 7 (15.6)             | 2 (16.7)             |          |

|                                                                |            |           |       |            |           |       |
|----------------------------------------------------------------|------------|-----------|-------|------------|-----------|-------|
| <b>Cough, chest, or breathing symptoms</b>                     | 17 (2.2)   | 3 (1.1)   | 0.359 | 24 (3.2)   | 8 (2.9)   | 1     |
| ≤2 days                                                        | 5 (29.4)   | 0 (0.0)   | 0.27  | 5 (20.8)   | 4 (50.0)  | 0.22  |
| 2-7 days                                                       | 11 (64.7)  | 2 (66.7)  |       | 17 (70.8)  | 3 (37.5)  |       |
| >7 days                                                        | 1 (5.9)    | 1 (33.3)  |       | 2 (8.3)    | 1 (12.5)  |       |
| <b>Nausea, vomiting, diarrhea, or other digestive symptoms</b> | 26 (3.4)   | 6 (2.2)   | 0.424 | 112 (14.8) | 27 (9.9)  | 0.055 |
| ≤2 days                                                        | 4 (15.4)   | 0 (0.0)   | 0.33  | 12 (10.7)  | 6 (22.2)  | 0.22  |
| 2-7 days                                                       | 21 (80.8)  | 5 (83.3)  |       | 98 (87.5)  | 20 (74.1) |       |
| >7 days                                                        | 1 (3.8)    | 1 (16.7)  |       | 2 (1.8)    | 1 (3.7)   |       |
| <b>Muscle, bone, joint, or nerve symptoms</b>                  | 100 (13.2) | 20 (7.4)  | 0.014 | 265 (35.0) | 65 (23.8) | 0.001 |
| ≤2 days                                                        | 12 (12.0)  | 2 (10.0)  | 0.26  | 34 (12.8)  | 11 (16.9) | 0.45  |
| 2-7 days                                                       | 83 (83.0)  | 15 (75.0) |       | 221 (83.4) | 50 (76.9) |       |
| >7 days                                                        | 5 (5.0)    | 3 (15.0)  |       | 10 (3.8)   | 4 (6.2)   |       |
| <b>Memory or mood change</b>                                   | 8 (1.1)    | 4 (1.5)   | 0.83  | 21 (2.8)   | 5 (1.8)   | 0.535 |
| ≤2 days                                                        | 2 (25.0)   | 0 (0.0)   | 0.52  | 9 (42.9)   | 1 (20.0)  | 0.64  |
| 2-7 days                                                       | 5 (62.5)   | 3 (75.0)  |       | 9 (42.9)   | 3 (60.0)  |       |
| >7 days                                                        | 1 (12.5)   | 1 (25.0)  |       | 3 (14.3)   | 1 (20.0)  |       |
| <b>Sleep changes</b>                                           | 26 (3.4)   | 7 (2.6)   | 0.617 | 85 (11.2)  | 16 (5.9)  | 0.015 |
| ≤2 days                                                        | 0 (0.0)    | 3 (42.9)  | 0.002 | 13 (15.3)  | 5 (31.2)  | 0.31  |
| 2-7 days                                                       | 25 (96.2)  | 4 (57.1)  |       | 64 (75.3)  | 10 (62.5) |       |
| >7 days                                                        | 1 (3.8)    | 0 (0.0)   |       | 8 (9.4)    | 1 (6.2)   |       |

Listed percentages for each symptom represent percent of entire respective subpopulation. Percentages for duration represent percent of symptomatic subpopulation in each timeframe.

\*Chi-Square or ANOVA for comparison of any presence of each symptom and duration of symptoms, respectively.

**Supplemental Table 2.** Self-reported symptoms following first and second dose of Pfizer-BioNTech SARS-CoV-2 vaccine, by sex.

|                                                       | Post-Dose 1       |                     |          | Post-Dose 2       |                     |          |
|-------------------------------------------------------|-------------------|---------------------|----------|-------------------|---------------------|----------|
|                                                       | Male<br>(n = 334) | Female<br>(n = 691) | P-value* | Male<br>(n = 334) | Female<br>(n = 691) | P-value* |
| <b>Any symptom, n (%)</b>                             | 179 (53.8)        | 429 (62.7)          | 0.008    | 220 (66.3)        | 527 (77.2)          | <0.001   |
| <b>Any symptom excluding injection site symptoms</b>  | 126 (37.8)        | 297 (43.4)          | 0.104    | 210 (63.3)        | 509 (74.5)          | <0.001   |
| <b>Pain at injection site</b>                         | 177 (53.0)        | 427 (61.8)          | 0.009    | 210 (62.9)        | 520 (75.3)          | <0.001   |
| ≤2 days                                               | 83 (46.9)         | 214 (50.1)          | 0.31     | 111 (52.9)        | 271 (52.1)          | 0.30     |
| 2-7 days                                              | 94 (53.1)         | 209 (48.9)          |          | 99 (47.1)         | 243 (46.7)          |          |
| >7 days                                               | 0 (0.0)           | 4 (0.9)             |          | 0 (0.0)           | 6 (1.2)             |          |
| <b>Fever or chills</b>                                | 38 (11.4)         | 70 (10.1)           | 0.616    | 115 (34.4)        | 293 (42.5)          | 0.017    |
| ≤2 days                                               | 2 (5.3)           | 3 (4.3)             | -        | 8 (7.0)           | 7 (2.4)             | 0.07     |
| 2-7 days                                              | 36 (94.7)         | 67 (95.7)           |          | 107 (93.0)        | 285 (97.3)          |          |
| >7 days                                               | 0 (0.0)           | 0 (0.0)             |          | 0 (0.0)           | 1 (0.3)             |          |
| <b>Fatigue or malaise</b>                             | 85 (25.4)         | 210 (30.4)          | 0.118    | 179 (53.8)        | 442 (64.1)          | 0.002    |
| ≤2 days                                               | 9 (10.6)          | 27 (12.9)           | 0.68     | 20 (11.2)         | 72 (16.3)           | 0.16     |
| 2-7 days                                              | 75 (88.2)         | 178 (84.8)          |          | 156 (87.2)        | 357 (80.8)          |          |
| >7 days                                               | 1 (1.2)           | 5 (2.4)             |          | 3 (1.7)           | 13 (2.9)            |          |
| <b>Headache, dizziness or lightheadedness</b>         | 63 (18.9)         | 156 (22.6)          | 0.205    | 127 (38.1)        | 321 (46.7)          | 0.012    |
| ≤2 days                                               | 7 (11.1)          | 23 (14.7)           | 0.21     | 11 (8.7)          | 34 (10.6)           | 0.39     |
| 2-7 days                                              | 56 (88.9)         | 127 (81.4)          |          | 114 (89.8)        | 275 (85.7)          |          |
| >7 days                                               | 0 (0.0)           | 6 (3.8)             |          | 2 (1.6)           | 12 (3.7)            |          |
| <b>Eye, ear, mouth, or throat changes</b>             | 10 (3.0)          | 13 (1.9)            | 0.371    | 11 (3.3)          | 22 (3.2)            | 1.0      |
| ≤2 days                                               | 1 (10.0)          | 4 (30.8)            | 0.29     | 4 (36.4)          | 2 (9.1)             | 0.10     |
| 2-7 days                                              | 8 (80.0)          | 9 (69.2)            |          | 7 (63.6)          | 17 (77.3)           |          |
| >7 days                                               | 1 (10.0)          | 0 (0.0)             |          | 0 (0.0)           | 3 (13.6)            |          |
| <b>Swollen lymph node, skin/nail, or face changes</b> | 1 (0.3)           | 9 (1.3)             | 0.232    | 9 (2.7)           | 48 (6.9)            | 0.008    |
| ≤2 days                                               | 0 (0.0)           | 3 (33.3)            | 0.44     | 1 (11.1)          | 25 (52.1)           | 0.03     |
| 2-7 days                                              | 0 (0.0)           | 3 (33.3)            |          | 7 (77.8)          | 15 (31.2)           |          |
| >7 days                                               | 1 (100.0)         | 3 (33.3)            |          | 1 (11.1)          | 8 (16.7)            |          |

|                                                                |           |           |       |           |            |       |
|----------------------------------------------------------------|-----------|-----------|-------|-----------|------------|-------|
| <b>Cough, chest, or breathing symptoms</b>                     | 5 (1.5)   | 15 (2.2)  | 0.624 | 3 (0.9)   | 28 (4.1)   | 0.01  |
| ≤2 days                                                        | 3 (60.0)  | 2 (13.3)  | 0.10  | 0 (0.0)   | 8 (28.6)   | 0.40  |
| 2-7 days                                                       | 2 (40.0)  | 11 (73.3) |       | 3 (100.0) | 17 (60.7)  |       |
| >7 days                                                        | 0 (0.0)   | 2 (13.3)  |       | 0 (0.0)   | 3 (10.7)   |       |
| <b>Nausea, vomiting, diarrhea, or other digestive symptoms</b> | 6 (1.8)   | 25 (3.6)  | 0.161 | 30 (9.0)  | 109 (15.8) | 0.004 |
| ≤2 days                                                        | 0 (0.0)   | 4 (16.0)  | 0.41  | 3 (10.0)  | 15 (13.8)  | 0.55  |
| 2-7 days                                                       | 6 (100.0) | 19 (76.0) |       | 27 (90.0) | 91 (83.5)  |       |
| >7 days                                                        | 0 (0.0)   | 2 (8.0)   |       | 0 (0.0)   | 3 (2.8)    |       |
| <b>Muscle, bone, joint, or nerve symptoms</b>                  | 31 (9.3)  | 88 (12.8) | 0.128 | 83 (24.9) | 242 (35.1) | 0.001 |
| ≤2 days                                                        | 4 (12.9)  | 10 (11.4) | 0.66  | 7 (8.4)   | 38 (15.7)  | 0.13  |
| 2-7 days                                                       | 26 (83.9) | 71 (80.7) |       | 74 (89.2) | 192 (79.3) |       |
| >7 days                                                        | 1 (3.2)   | 7 (8.0)   |       | 2 (2.4)   | 12 (5.0)   |       |
| <b>Memory or mood change</b>                                   | 3 (0.9)   | 9 (1.3)   | 0.799 | 8 (2.4)   | 18 (2.6)   | 1.0   |
| ≤2 days                                                        | 0 (0.0)   | 2 (22.2)  | 0.37  | 3 (37.5)  | 7 (38.9)   | 0.30  |
| 2-7 days                                                       | 3 (100.0) | 5 (55.6)  |       | 5 (62.5)  | 7 (38.9)   |       |
| >7 days                                                        | 0 (0.0)   | 2 (22.2)  |       | 0 (0.0)   | 4 (22.2)   |       |
| <b>Sleep changes</b>                                           | 10 (3.0)  | 22 (3.2)  | 1.0   | 27 (8.1)  | 73 (10.6)  | 0.251 |
| ≤2 days                                                        | 2 (20.0)  | 1 (4.5)   | 0.32  | 3 (11.1)  | 14 (19.2)  | 0.28  |
| 2-7 days                                                       | 8 (80.0)  | 20 (90.9) |       | 23 (85.2) | 51 (69.9)  |       |
| >7 days                                                        | 0 (0.0)   | 1 (4.5)   |       | 1 (3.7)   | 8 (11.0)   |       |

Listed percentages for each symptom represent percent of entire respective subpopulation. Percentages for duration represent percent of symptomatic subpopulation in each timeframe.

\*Chi-Square or ANOVA for comparison of any presence of each symptom and duration of symptoms, respectively.

**Supplemental Table 3.** Self-reported symptoms following first and second dose of Pfizer-BioNTech SARS-CoV-2 vaccine, by infection status.

|                                                       | Post-Dose 1                  |                             |          | Post-Dose 2                  |                             |          |
|-------------------------------------------------------|------------------------------|-----------------------------|----------|------------------------------|-----------------------------|----------|
|                                                       | Infection Naive<br>(n = 949) | Prior Infection<br>(n = 83) | P-value* | Infection Naive<br>(n = 949) | Prior Infection<br>(n = 83) | P-value* |
| <b>Any symptom, n (%)</b>                             | 557 (59.2)                   | 57 (68.7)                   | 0.116    | 690 (73.5)                   | 62 (74.7)                   | 0.912    |
| <b>Any symptom excluding injection site symptoms</b>  | 386 (41.0)                   | 42 (50.6)                   | 0.114    | 664 (70.7)                   | 60 (72.3)                   | 0.86     |
| <b>Pain at injection site</b>                         | 554 (58.4)                   | 56 (67.5)                   | 0.134    | 677 (71.3)                   | 58 (69.9)                   | 0.877    |
| ≤2 days                                               | 266 (48.0)                   | 34 (60.7)                   | 0.17     | 353 (52.1)                   | 34 (58.6)                   | 0.52     |
| 2-7 days                                              | 284 (51.3)                   | 22 (39.3)                   |          | 318 (47.0)                   | 24 (41.4)                   |          |
| >7 days                                               | 4 (0.7)                      | 0 (0.0)                     |          | 6 (0.9)                      | 0 (0.0)                     |          |
| <b>Fever or chills</b>                                | 86 (9.1)                     | 22 (26.5)                   | <0.001   | 377 (39.8)                   | 33 (39.8)                   | 1.0      |
| ≤2 days                                               | 4 (4.7)                      | 1 (4.5)                     | -        | 13 (3.4)                     | 2 (6.1)                     | 0.72     |
| 2-7 days                                              | 82 (95.3)                    | 21 (95.5)                   |          | 363 (96.3)                   | 31 (93.9)                   |          |
| >7 days                                               | 0 (0.0)                      | 0 (0.0)                     |          | 1 (0.3)                      | 0 (0.0)                     |          |
| <b>Fatigue or malaise</b>                             | 268 (28.2)                   | 29 (34.9)                   | 0.243    | 578 (61.0)                   | 48 (57.8)                   | 0.648    |
| ≤2 days                                               | 34 (12.7)                    | 2 (6.9)                     | 0.46     | 87 (15.1)                    | 7 (14.6)                    | 0.50     |
| 2-7 days                                              | 228 (85.1)                   | 27 (93.1)                   |          | 475 (82.2)                   | 41 (85.4)                   |          |
| >7 days                                               | 6 (2.2)                      | 0 (0.0)                     |          | 16 (2.8)                     | 0 (0.0)                     |          |
| <b>Headache, dizziness or lightheadedness</b>         | 200 (21.1)                   | 22 (26.5)                   | 0.315    | 421 (44.6)                   | 30 (36.1)                   | 0.172    |
| ≤2 days                                               | 31 (15.5)                    | 0 (0.0)                     | 0.13     | 42 (10.0)                    | 4 (13.3)                    | 0.84     |
| 2-7 days                                              | 164 (82.0)                   | 21 (95.5)                   |          | 366 (86.9)                   | 25 (83.3)                   |          |
| >7 days                                               | 5 (2.5)                      | 1 (4.5)                     |          | 13 (3.1)                     | 1 (3.3)                     |          |
| <b>Eye, ear, mouth, or throat changes</b>             | 21 (2.2)                     | 2 (2.4)                     | 1.0      | 31 (3.3)                     | 3 (3.6)                     | 1.0      |
| ≤2 days                                               | 5 (23.8)                     | 0 (0.0)                     | 0.68     | 4 (12.9)                     | 2 (66.7)                    | 0.06     |
| 2-7 days                                              | 15 (71.4)                    | 2 (100.0)                   |          | 24 (77.4)                    | 1 (33.3)                    |          |
| >7 days                                               | 1 (4.8)                      | 0 (0.0)                     |          | 3 (9.7)                      | 0 (0.0)                     |          |
| <b>Swollen lymph node, skin/nail, or face changes</b> | 8 (0.8)                      | 2 (2.4)                     | 0.417    | 56 (5.9)                     | 1 (1.2)                     | 0.122    |
| ≤2 days                                               | 2 (25.0)                     | 1 (50.0)                    | 0.44     | 25 (44.6)                    | 1 (100.0)                   | 0.55     |
| 2-7 days                                              | 2 (25.0)                     | 1 (50.0)                    |          | 22 (39.3)                    | 0 (0.0)                     |          |

|                                                                |            |           |       |            |           |       |
|----------------------------------------------------------------|------------|-----------|-------|------------|-----------|-------|
| >7 days                                                        | 4 (50.0)   | 0 (0.0)   |       | 9 (16.1)   | 0 (0.0)   |       |
| <b>Cough, chest, or breathing symptoms</b>                     | 19 (2.0)   | 1 (1.2)   | 0.928 | 32 (3.4)   | 0 (0.0)   | 0.171 |
| ≤2 days                                                        | 5 (26.3)   | 0 (0.0)   | 0.75  | 9 (28.1)   | 0 (0.0)   | -     |
| 2-7 days                                                       | 12 (63.2)  | 1 (100.0) |       | 20 (62.5)  | 0 (0.0)   |       |
| >7 days                                                        | 2 (10.5)   | 0 (0.0)   |       | 3 (9.4)    | 0 (0.0)   |       |
| <b>Nausea, vomiting, diarrhea, or other digestive symptoms</b> | 26 (2.7)   | 6 (7.2)   | 0.053 | 129 (13.6) | 10 (12.0) | 0.82  |
| ≤2 days                                                        | 4 (15.4)   | 0 (0.0)   | 0.43  | 17 (13.2)  | 1 (10.0)  | 0.84  |
| 2-7 days                                                       | 20 (76.9)  | 6 (100.0) |       | 109 (84.5) | 9 (90.0)  |       |
| >7 days                                                        | 2 (7.7)    | 0 (0.0)   |       | 3 (2.3)    | 0 (0.0)   |       |
| <b>Muscle, bone, joint, or nerve symptoms</b>                  | 107 (11.3) | 13 (15.7) | 0.311 | 304 (32.1) | 26 (31.3) | 0.987 |
| ≤2 days                                                        | 13 (12.1)  | 1 (7.7)   | 0.50  | 40 (13.2)  | 5 (19.2)  | 0.40  |
| 2-7 days                                                       | 86 (80.4)  | 12 (92.3) |       | 250 (82.2) | 21 (80.8) |       |
| >7 days                                                        | 8 (7.5)    | 0 (0.0)   |       | 14 (4.6)   | 0 (0.0)   |       |
| <b>Memory or mood change</b>                                   | 11 (1.2)   | 1 (1.2)   | 1.0   | 23 (2.4)   | 3 (3.6)   | 0.765 |
| ≤2 days                                                        | 2 (18.2)   | 0 (0.0)   | 0.76  | 8 (34.8)   | 2 (66.7)  | 0.51  |
| 2-7 days                                                       | 7 (63.6)   | 1 (100.0) |       | 11 (47.8)  | 1 (33.3)  |       |
| >7 days                                                        | 2 (18.2)   | 0 (0.0)   |       | 4 (17.4)   | 0 (0.0)   |       |
| <b>Sleep changes</b>                                           | 28 (3.0)   | 5 (6.0)   | 0.231 | 95 (10.0)  | 6 (7.2)   | 0.53  |
| ≤2 days                                                        | 3 (10.7)   | 0 (0.0)   | 0.67  | 17 (17.9)  | 1 (16.7)  | 0.80  |
| 2-7 days                                                       | 24 (85.7)  | 5 (100.0) |       | 70 (73.7)  | 4 (66.7)  |       |
| >7 days                                                        | 1 (3.6)    | 0 (0.0)   |       | 8 (8.4)    | 1 (16.7)  |       |

Listed percentages for each symptom represent percent of entire respective subpopulation. Percentages for duration represent percent of symptomatic subpopulation in each timeframe.

\*Chi-Square or ANOVA for comparison of any presence of each symptom and duration of symptoms, respectively.

**Supplemental Table 4.** Self-reported symptoms following first and second dose of Pfizer-BioNTech SARS-CoV-2 vaccine, by race and ethnicity.

|                                                       | Post-Dose 1         |                                  |                                 |                  |                                  |          | Post-Dose 2         |                                  |                                 |                  |                                  |          |
|-------------------------------------------------------|---------------------|----------------------------------|---------------------------------|------------------|----------------------------------|----------|---------------------|----------------------------------|---------------------------------|------------------|----------------------------------|----------|
|                                                       | Hispanic<br>(n=126) | Non-Hispanic<br>Asian<br>(n=280) | Non-Hispanic<br>Black<br>(n=33) | Other<br>(n=100) | Non-Hispanic<br>White<br>(n=493) | P-value* | Hispanic<br>(n=126) | Non-Hispanic<br>Asian<br>(n=280) | Non-Hispanic<br>Black<br>(n=33) | Other<br>(n=100) | Non-Hispanic<br>White<br>(n=493) | P-value* |
| <b>Any symptom, n (%)</b>                             | 74 (59.7)           | 164 (59.4)                       | 20 (60.6)                       | 57 (57.0)        | 299 (60.9)                       | 0.964    | 87 (69.6)           | 198 (71.2)                       | 23 (71.9)                       | 74 (75.5)        | 370 (75.7)                       | 0.534    |
| <b>Any symptom excluding injection site symptoms</b>  | 59 (47.6)           | 123 (44.6)                       | 16 (48.5)                       | 41 (41.0)        | 189 (38.5)                       | 0.248    | 81 (64.8)           | 191 (68.7)                       | 23 (71.9)                       | 73 (74.5)        | 356 (72.8)                       | 0.357    |
| <b>Fever or chills</b>                                | 13 (10.3)           | 38 (13.6)                        | 5 (15.2)                        | 8 (8.0)          | 44 (8.9)                         | 0.235    | 35 (27.8)           | 109 (38.9)                       | 11 (34.4)                       | 46 (46.0)        | 209 (42.4)                       | 0.026    |
| ≤2 days                                               | 1 (7.7)             | 4 (10.5)                         | 0 (0.0)                         | 0 (0.0)          | 0 (0.0)                          | -        | 2 (5.7)             | 3 (2.8)                          | 0 (0.0)                         | 1 (2.2)          | 9 (4.3)                          | 0.30     |
| 2-7 days                                              | 12 (92.3)           | 34 (89.5)                        | 5 (100.0)                       | 8 (100.0)        | 44 (100.0)                       |          | 33 (94.3)           | 106 (97.2)                       | 11 (100.0)                      | 44 (95.7)        | 200 (95.7)                       |          |
| >7 days                                               | 0 (0.0)             | 0 (0.0)                          | 0 (0.0)                         | 0 (0.0)          | 0 (0.0)                          |          | 0 (0.0)             | 0 (0.0)                          | 0 (0.0)                         | 1 (2.2)          | 0 (0.0)                          |          |
| <b>Fatigue or malaise</b>                             | 36 (28.6)           | 92 (32.9)                        | 15 (45.5)                       | 31 (31.0)        | 123 (24.9)                       | 0.033    | 65 (51.6)           | 165 (58.9)                       | 20 (60.6)                       | 67 (68.4)        | 309 (62.7)                       | 0.092    |
| ≤2 days                                               | 7 (19.4)            | 11 (12.0)                        | 2 (13.3)                        | 2 (6.5)          | 14 (11.4)                        | 0.712    | 11 (16.9)           | 17 (10.3)                        | 2 (10.0)                        | 19 (28.4)        | 45 (14.6)                        | 0.002    |
| 2-7 days                                              | 29 (80.6)           | 79 (85.9)                        | 12 (80.0)                       | 28 (90.3)        | 107 (87.0)                       |          | 50 (76.9)           | 147 (89.1)                       | 16 (80.0)                       | 46 (68.7)        | 257 (83.2)                       |          |
| >7 days                                               | 0 (0.0)             | 2 (2.2)                          | 1 (6.7)                         | 1 (3.2)          | 2 (1.6)                          |          | 4 (6.2)             | 1 (0.6)                          | 2 (10.0)                        | 2 (3.0)          | 7 (2.3)                          |          |
| <b>Headache, dizziness or lightheadedness</b>         | 34 (27.2)           | 66 (23.7)                        | 8 (24.2)                        | 21 (21.0)        | 93 (18.9)                        | 0.253    | 52 (41.3)           | 112 (40.3)                       | 14 (42.4)                       | 49 (49.0)        | 224 (45.6)                       | 0.447    |
| ≤2 days                                               | 5 (14.7)            | 8 (12.1)                         | 1 (12.5)                        | 5 (23.8)         | 12 (12.9)                        | 0.241    | 8 (15.4)            | 8 (7.1)                          | 2 (14.3)                        | 4 (8.2)          | 24 (10.7)                        | 0.066    |
| 2-7 days                                              | 28 (82.4)           | 57 (86.4)                        | 6 (75.0)                        | 14 (66.7)        | 80 (86.0)                        |          | 40 (76.9)           | 102 (91.1)                       | 10 (71.4)                       | 44 (89.8)        | 195 (87.1)                       |          |
| >7 days                                               | 1 (2.9)             | 1 (1.5)                          | 1 (12.5)                        | 2 (9.5)          | 1 (1.1)                          |          | 4 (7.7)             | 2 (1.8)                          | 2 (14.3)                        | 1 (2.0)          | 5 (2.2)                          |          |
| <b>Eye, ear, mouth, or throat changes</b>             | 5 (4.0)             | 5 (1.8)                          | 1 (3.0)                         | 1 (1.0)          | 11 (2.2)                         | 0.587    | 3 (2.4)             | 12 (4.3)                         | 3 (9.1)                         | 4 (4.0)          | 12 (2.4)                         | 0.203    |
| ≤2 days                                               | 1 (20.0)            | 2 (40.0)                         | 0 (0.0)                         | 1 (100.0)        | 1 (9.1)                          | 0.284    | 0 (0.0)             | 3 (25.0)                         | 1 (33.3)                        | 0 (0.0)          | 2 (16.7)                         | 0.845    |
| 2-7 days                                              | 3 (60.0)            | 3 (60.0)                         | 1 (100.0)                       | 0 (0.0)          | 10 (90.9)                        |          | 3 (100.0)           | 8 (66.7)                         | 2 (66.7)                        | 3 (75.0)         | 9 (75.0)                         |          |
| >7 days                                               | 1 (20.0)            | 0 (0.0)                          | 0 (0.0)                         | 0 (0.0)          | 0 (0.0)                          |          | 0 (0.0)             | 1 (8.3)                          | 0 (0.0)                         | 1 (25.0)         | 1 (8.3)                          |          |
| <b>Swollen lymph node, skin/nail, or face changes</b> | 2 (1.6)             | 4 (1.4)                          | 1 (3.0)                         | 1 (1.0)          | 2 (0.4)                          | 0.377    | 6 (4.8)             | 11 (3.9)                         | 0 (0.0)                         | 6 (6.0)          | 34 (6.9)                         | 0.262    |
| ≤2 days                                               | 0 (0.0)             | 1 (25.0)                         | 1 (100.0)                       | 1 (100.0)        | 0 (0.0)                          | 0.573    | 2 (33.3)            | 3 (27.3)                         | 0 (0.0)                         | 2 (33.3)         | 19 (55.9)                        | -        |
| 2-7 days                                              | 1 (50.0)            | 1 (25.0)                         | 0 (0.0)                         | 0 (0.0)          | 1 (50.0)                         |          | 3 (50.0)            | 6 (54.5)                         | 0 (0.0)                         | 4 (66.7)         | 9 (26.5)                         |          |
| >7 days                                               | 1 (50.0)            | 2 (50.0)                         | 0 (0.0)                         | 0 (0.0)          | 1 (50.0)                         |          | 1 (16.7)            | 2 (18.2)                         | 0 (0.0)                         | 0 (0.0)          | 6 (17.6)                         |          |
| <b>Cough, chest, or breathing symptoms</b>            | 4 (3.2)             | 4 (1.4)                          | 1 (3.0)                         | 3 (3.0)          | 8 (1.6)                          | 0.653    | 4 (3.2)             | 14 (5.0)                         | 0 (0.0)                         | 4 (4.0)          | 10 (2.0)                         | 0.16     |
| ≤2 days                                               | 2 (50.0)            | 1 (25.0)                         | 0 (0.0)                         | 1 (33.3)         | 1 (12.5)                         | 0.841    | 2 (50.0)            | 4 (28.6)                         | 0 (0.0)                         | 1 (25.0)         | 2 (20.0)                         | -        |
| 2-7 days                                              | 2 (50.0)            | 2 (50.0)                         | 1 (100.0)                       | 2 (66.7)         | 6 (75.0)                         |          | 2 (50.0)            | 9 (64.3)                         | 0 (0.0)                         | 3 (75.0)         | 6 (60.0)                         |          |
| >7 days                                               | 0 (0.0)             | 1 (25.0)                         | 0 (0.0)                         | 0 (0.0)          | 1 (12.5)                         |          | 0 (0.0)             | 1 (7.1)                          | 0 (0.0)                         | 0 (0.0)          | 2 (20.0)                         |          |

|                                                                |           |           |          |           |           |       |           |           |           |           |            |        |
|----------------------------------------------------------------|-----------|-----------|----------|-----------|-----------|-------|-----------|-----------|-----------|-----------|------------|--------|
| <b>Nausea, vomiting, diarrhea, or other digestive symptoms</b> | 4 (3.2)   | 10 (3.6)  | 3 (9.1)  | 3 (3.0)   | 12 (2.4)  | 0.30  | 18 (14.3) | 33 (11.8) | 7 (21.2)  | 16 (16.0) | 65 (13.2)  | 0.552  |
| ≤2 days                                                        | 1 (25.0)  | 2 (20.0)  | 0 (0.0)  | 0 (0.0)   | 1 (8.3)   | 0.209 | 4 (22.2)  | 3 (9.1)   | 1 (14.3)  | 1 (6.2)   | 9 (13.8)   | 0.155  |
| 2-7 days                                                       | 3 (75.0)  | 8 (80.0)  | 2 (66.7) | 2 (66.7)  | 11 (91.7) |       | 13 (72.2) | 30 (90.9) | 5 (71.4)  | 14 (87.5) | 56 (86.2)  |        |
| >7 days                                                        | 0 (0.0)   | 0 (0.0)   | 1 (33.3) | 1 (33.3)  | 0 (0.0)   |       | 1 (5.6)   | 0 (0.0)   | 1 (14.3)  | 1 (6.2)   | 0 (0.0)    |        |
| <b>Muscle, bone, joint, or nerve symptoms</b>                  | 18 (14.3) | 41 (14.7) | 4 (12.1) | 10 (10.0) | 47 (9.5)  | 0.216 | 35 (28.0) | 81 (28.9) | 16 (48.5) | 34 (34.0) | 164 (33.3) | 0.147  |
| ≤2 days                                                        | 1 (5.6)   | 6 (14.6)  | 0 (0.0)  | 3 (30.0)  | 4 (8.5)   | 0.158 | 3 (8.6)   | 15 (18.5) | 0 (0.0)   | 6 (17.6)  | 21 (12.8)  | 0.058  |
| 2-7 days                                                       | 14 (77.8) | 34 (82.9) | 3 (75.0) | 6 (60.0)  | 41 (87.2) |       | 27 (77.1) | 64 (79.0) | 15 (93.8) | 27 (79.4) | 138 (84.1) |        |
| >7 days                                                        | 3 (16.7)  | 1 (2.4)   | 1 (25.0) | 1 (10.0)  | 2 (4.3)   |       | 5 (14.3)  | 2 (2.5)   | 1 (6.2)   | 1 (2.9)   | 5 (3.0)    |        |
| <b>Memory or mood change</b>                                   | 1 (0.8)   | 0 (0.0)   | 2 (6.1)  | 2 (2.0)   | 7 (1.4)   | 0.024 | 2 (1.6)   | 8 (2.9)   | 1 (3.0)   | 6 (6.0)   | 9 (1.8)    | 0.164  |
| ≤2 days                                                        | 0 (0.0)   | 0 (0.0)   | 0 (0.0)  | 0 (0.0)   | 2 (28.6)  | -     | 1 (50.0)  | 3 (37.5)  | 0 (0.0)   | 2 (33.3)  | 4 (44.4)   | 0.623  |
| 2-7 days                                                       | 1 (100.0) | 0 (0.0)   | 1 (50.0) | 1 (50.0)  | 5 (71.4)  |       | 1 (50.0)  | 4 (50.0)  | 0 (0.0)   | 3 (50.0)  | 4 (44.4)   |        |
| >7 days                                                        | 0 (0.0)   | 0 (0.0)   | 1 (50.0) | 1 (50.0)  | 0 (0.0)   |       | 0 (0.0)   | 1 (12.5)  | 1 (100.0) | 1 (16.7)  | 1 (11.1)   |        |
| <b>Sleep changes</b>                                           | 6 (4.8)   | 10 (3.6)  | 2 (6.1)  | 3 (3.0)   | 12 (2.4)  | 0.574 | 9 (7.1)   | 22 (7.9)  | 2 (6.1)   | 15 (15.0) | 53 (10.8)  | 0.177  |
| ≤2 days                                                        | 0 (0.0)   | 1 (10.0)  | 0 (0.0)  | 1 (33.3)  | 1 (8.3)   | 0.016 | 0 (0.0)   | 6 (27.3)  | 0 (0.0)   | 7 (46.7)  | 5 (9.4)    | <0.001 |
| 2-7 days                                                       | 6 (100.0) | 9 (90.0)  | 1 (50.0) | 2 (66.7)  | 11 (91.7) |       | 5 (55.6)  | 15 (68.2) | 1 (50.0)  | 7 (46.7)  | 46 (86.8)  |        |
| >7 days                                                        | 0 (0.0)   | 0 (0.0)   | 1 (50.0) | 0 (0.0)   | 0 (0.0)   |       | 4 (44.4)  | 1 (4.5)   | 1 (50.0)  | 1 (6.7)   | 2 (3.8)    |        |

Listed percentages for each symptom represent percent of entire respective subpopulation. Percentages for duration represent percent of symptomatic subpopulation in each timeframe.

\*Chi-Square or ANOVA for comparison of any presence of each symptom and duration of symptoms, respectively.
